# Supplementary material
Source: HighWire-hosted journal article supplement (https://bjgpopen.org/highwire/filestream/5746/field_highwire_adjunct_files/0/Sijbom_BJGPO.2022.0049_supp.pdf)
Supplement: Sijbom_BJGPO.2022.0049_supp.pdf [file Sijbom_BJGPO.2022.0049_supp.pdf]

# 1 Supplement

## 2 Supplement 1. Multiple imputation

3 **Table 1. Details of the multiple imputation process**

|                                                                                              |                                                                                                                                                                                                                                          |
|----------------------------------------------------------------------------------------------|------------------------------------------------------------------------------------------------------------------------------------------------------------------------------------------------------------------------------------------|
| Software used:                                                                               | IBM SPSS statistics version 25                                                                                                                                                                                                           |
| Imputation method and keysettings:                                                           | Fully Conditional Specification Method Iterations;<br>maximum iterations 10                                                                                                                                                              |
| Number of imputed data sets created                                                          | 15                                                                                                                                                                                                                                       |
| Variable include in the imputation procedure (imputed or used as predictors of missing data) | Age, sex, kidney failure, liver failure, heart disease, respiratory disease, Diabetes Mellitus, hiv-positive, down syndrome, antibiotic prescription, hospital admission, intensive care admission, death, body mass index, smoke status |
| Treatment of normally distributed variables                                                  | Linear regression                                                                                                                                                                                                                        |
| Treatment of binary/categorical variables                                                    | Logistic regression                                                                                                                                                                                                                      |
| Imputed values                                                                               | 1 <sup>st</sup> and 2 <sup>nd</sup> wave respectively:<br>Body mass index missing values 84.3% (1434) and 61.9% (4274) (minimum values 17 and maximum 57)<br>Smoke status missing values 84.3% (1434) and 60.6% (4182)                   |

4

5 **Table 2. Effect multiple imputation on average BMI and percentage smokers**

|                | 1th wave                    |                            | 2 <sup>nd</sup> wave        |                            |
|----------------|-----------------------------|----------------------------|-----------------------------|----------------------------|
|                | Before multiple imputation* | After multiple imputation* | Before multiple imputation* | After multiple imputation* |
| BMI > 29       | 42.2%                       | 49.2%                      | 43.6%                       | 46.7%                      |
| Smoking status | 23.8%                       | 29.0%                      | 16.4%                       | 20.4%                      |

6 BMI: Body Mass Index.

7 \* This percentage was calculated using the population number with known BMI or smoke status as  
8 denominator.

9
